# Supplementary material for: Efficient Near-Infrared-Activated Photocatalytic Hydrogen Evolution from Ammonia Borane with Core-Shell Upconversion-Semiconductor Hybrid Nanostructures
Source: MDPI journal article supplement (doi:10.3390/nano11123237), 2021-11-29
Supplement: s1 [file s1]

# Efficient Near-Infrared-Activated Photocatalytic Hydrogen Evolution from Ammonia Borane with Core-Shell Upconversion-Semiconductor Hybrid Nanostructures

Andrew J. Evangelista, Mariia Ivanchenko and Hao Jing \*

Department of Chemistry and Biochemistry, George Mason University, Fairfax, VA 22030, USA;  
aevange3@gmu.edu (A.J.E.); mivanch@gmu.edu (M.I.)

\* Correspondence: hjing2@gmu.edu

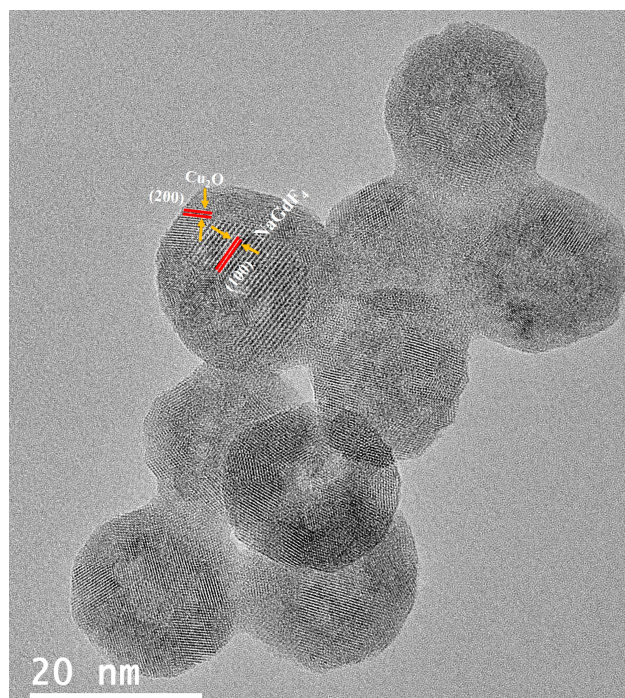

**Figure S1.** Additional high-resolution TEM image of UCNPs@Cu<sub>2</sub>O core-shell hybrid hetero-nanostructures.

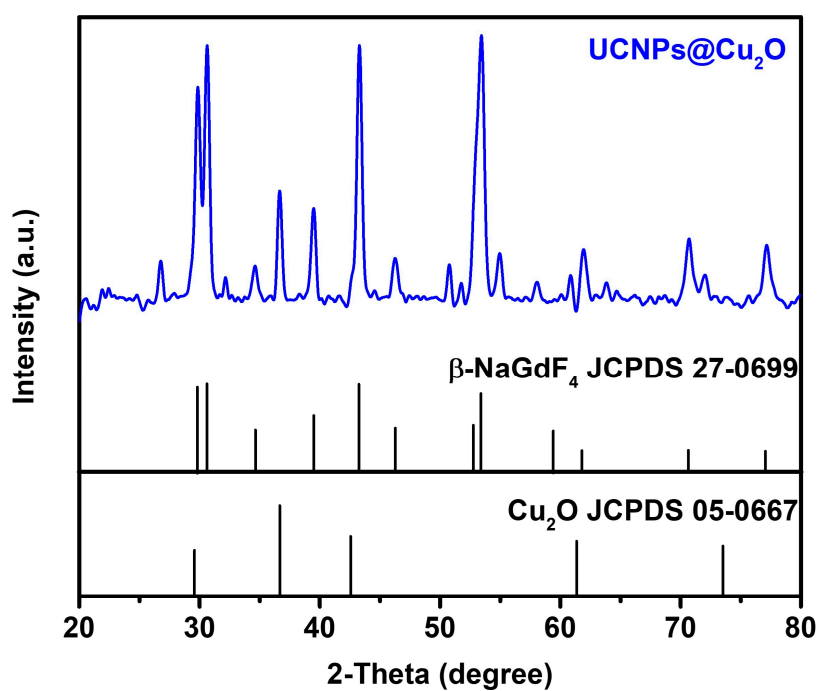

**Figure S2.** XRD patterns of NaGdF<sub>4</sub>:Yb<sup>3+</sup>/Er<sup>3+</sup>@NaGdF<sub>4</sub>@Cu<sub>2</sub>O (UCNPs@Cu<sub>2</sub>O). Standard XRD patterns of pure NaGdF<sub>4</sub> (JCPDS 27-0699) and Cu<sub>2</sub>O (JCPDS 05-0667) are also shown.

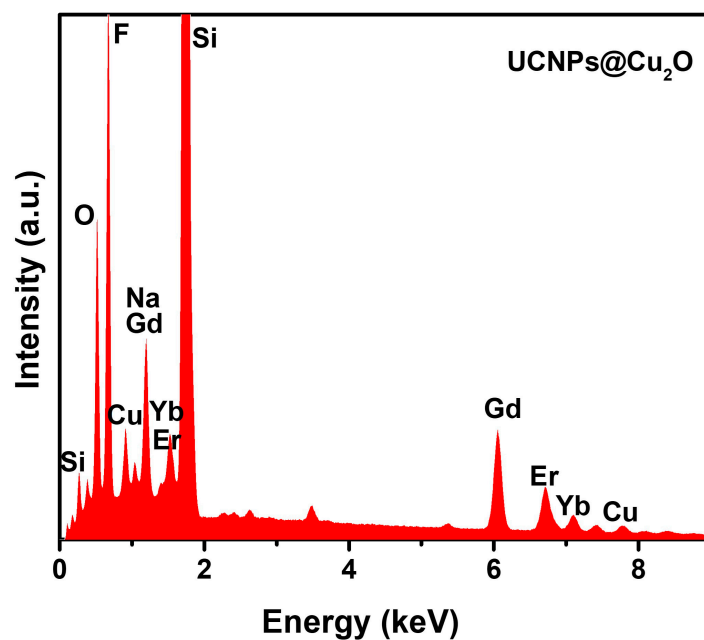

**Figure S3.** Energy-dispersive X-ray (EDX) spectra of core-shell NaGdF<sub>4</sub>:Yb<sup>3+</sup>/Er<sup>3+</sup>@NaGdF<sub>4</sub>@Cu<sub>2</sub>O (UCNPs@Cu<sub>2</sub>O) nanoparticles.

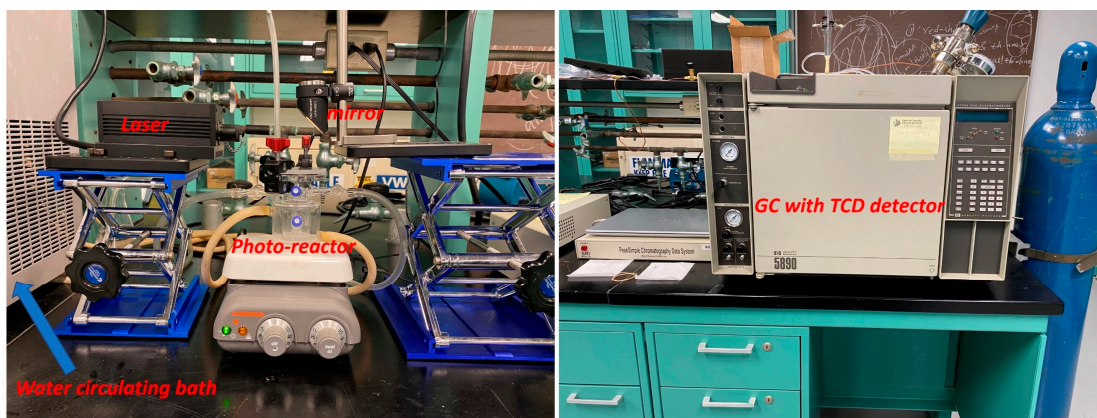

**Figure S4.** The picture of the experimental setup for the photocatalytic H<sub>2</sub> evolution.

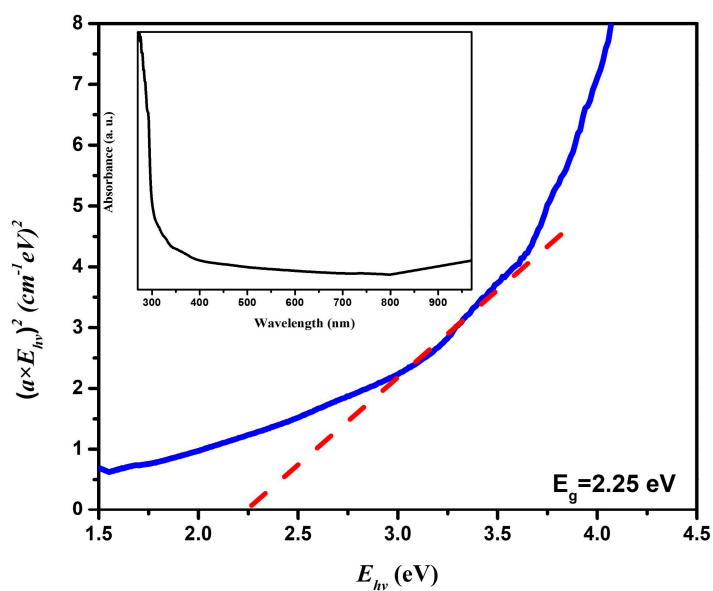

**Figure S5.** Tauc plot  $\alpha h\nu = A(h\nu - E_g)^{1/2}$  of UCNPs@Cu<sub>2</sub>O, where  $\alpha$  is the absorption coefficient,  $h$  is the Plank constant,  $\nu$  is the photon frequency, and  $A$  is a constant. Direct band gap values are determined by extrapolating  $h\nu$  to  $\alpha = 0$ . (Inset) UV-absorbance of UCNPs@Cu<sub>2</sub>O core-shell hybrid hetero-nanostructures.

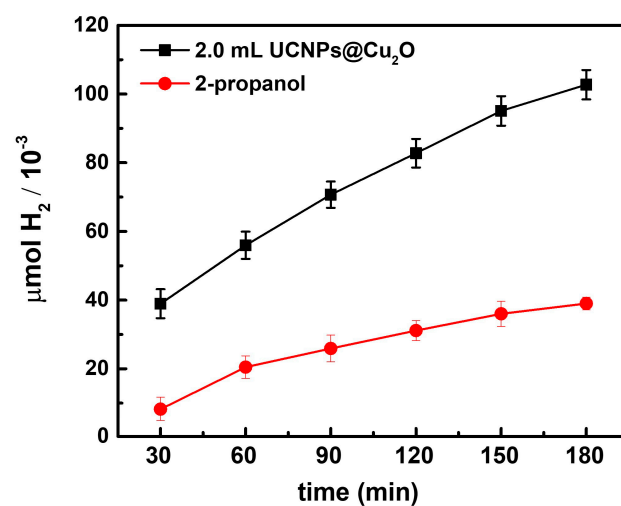

**Figure S6.** The photocatalytic H<sub>2</sub> evolution from AB dehydrogenation over the time catalyzed by UCNPs@Cu<sub>2</sub>O in the absence (black) and presence of 2-propanol (red) acting as the hydroxyl radical scavenger under 980 nm NIR laser irradiation.
